# Supplementary material for: The zebrafish miR-125c is induced under hypoxic stress via hypoxia-inducible factor 1α and functions in cellular adaptations and embryogenesis
Source: PubMed Central journal article supplement (PMC5650306; doi:10.18632/oncotarget.17994), 2017-05-18
Supplement: oncotarget-08-73846-s001.pdf [file oncotarget-08-73846-s001.pdf]

## The zebrafish miR-125c is induced under hypoxic stress *via* hypoxia-inducible factor 1 $\alpha$ and functions in cellular adaptations and embryogenesis

### SUPPLEMENTARY MATERIALS

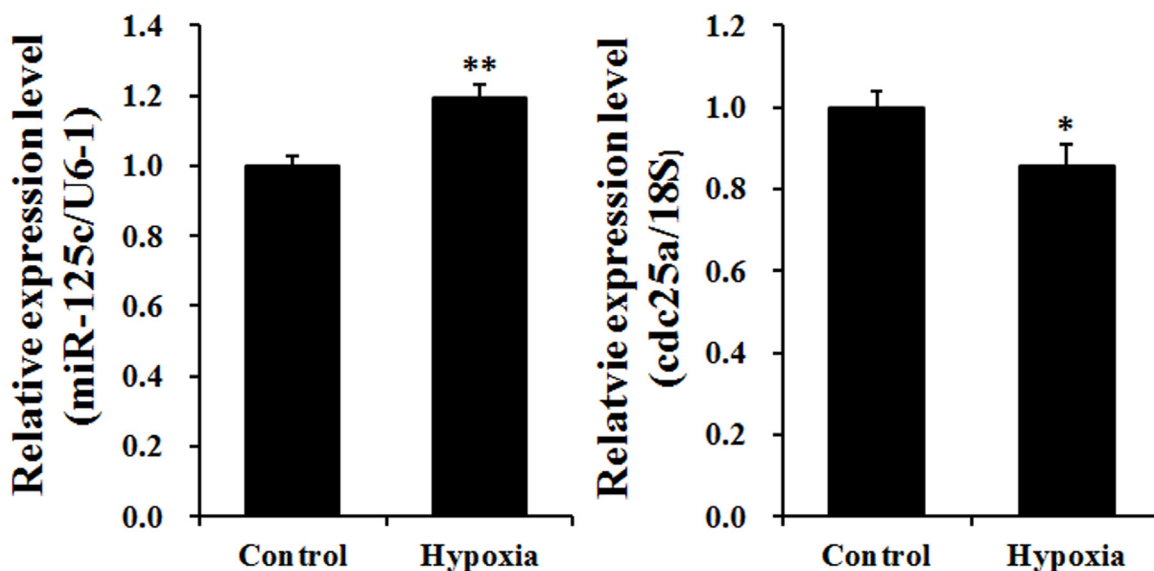

Supplementary Figure 1: Expression levels of miR-125c and cdc25a in zebrafish embryos in respond to acute hypoxic stress evaluated by qRT-PCR. Zebrafish embryos were exposed to low oxygen (1.0 mg/L) from 34 hpf to 36 hpf and collected for qRT-PCR analysis. U6-1 and 18s rRNA are used as the endogenous control. Values represent means  $\pm$  S.D. ( $n = 3$ ,  $**P < 0.01$ ,  $*P < 0.05$ ).

|                 |  |                          |                           |
|-----------------|--|--------------------------|---------------------------|
| <b>miR-125c</b> |  | > <i>Danio rerio</i>     | TCCCTGAGACCCT--AACTCGTGA- |
|                 |  | > <i>Oryzias latipes</i> | TCCCTGAGACCCT--AACTTGTGAC |
| <b>miR-125a</b> |  | > <i>Homo sapiens</i>    | TCCCTGAGACCCTTTAACCTGTGA- |
|                 |  | > <i>Mus musculus</i>    | TCCCTGAGACCCTTTAACCTGTGA- |
|                 |  | > <i>Danio rerio</i>     | TCCCTGAGACCCTT-AACCTGTG-- |
|                 |  | > <i>Oryzias latipes</i> | TCCCTGAGACCCTT-AACCTGTG-- |
| <b>miR-125b</b> |  | > <i>Homo sapiens</i>    | TCCCTGAGACCCT--AACTTGTGA- |
|                 |  | > <i>Mus musculus</i>    | TCCCTGAGACCCT--AACTTGTGA- |
|                 |  | > <i>Danio rerio</i>     | TCCCTGAGACCCT--AACTTGTGA- |
|                 |  | > <i>Oryzias latipes</i> | TCCCTGAGACCCT--AACTTGTGA- |

**Supplementary Figure 2: Multiple sequence alignment of miR-125 family.** The seed sequences inside the box are absolutely identical between zebrafish, human and mouse.

**Supplementary Video 1: Impaired motor function.** See Supplementary\_Video\_1.

**Supplementary Video 2: Normal motor function.** See Supplementary\_Video\_2.
